# Supplementary material for: Impact of Antiviral Treatment on Long-Term Prognosis in Non-Immunocompromised Patients With CMV Reactivation
Source: Research Square preprint supplement (doi:10.21203/rs.3.rs-145629/v1), 2021-01-29
Supplement: Supplementary file 1 [file 638b4ec86cb695cc930e875b.docx]

**Impact of antiviral treatment on long-term prognosis in non-immunocompromised patients with CMV reactivation**

Ga Eun Park1, Hyun Kyun Ki1and Jae-Hoon Ko2*

1 Division of Infectious Disease, Konkuk University medical center, Konkuk University School of Medicine, Seoul, Korea

1 Division of Infectious Disease, Konkuk University medical center, Konkuk University School of Medicine, Seoul, Korea

2* Division of Infectious Diseases, Department of Medicine, Samsung Medical Center, Sungkyunkwan University School of Medicine, Seoul, Republic of Korea

**Correspondence to:**

***Jae-Hoon Ko, MD**

Division of Infectious Diseases, Samsung Medical Center, Sungkyunkwan University School of Medicine, 81 Irwon-ro, Gangnam-gu, Seoul 06351, Republic of Korea.

E-mail: [jaehoon.ko@gmail.com](mailto:jaehoon.ko@gmail.com)

**Table S1. Association between baseline characteristics of patients and 1-year survival**

|  | Univariate |  | Multivariate |  |
| --- | --- | --- | --- | --- |
|  | HR (95% CI) | P value | HR (95% CI) | P value |
| Sex | 1.389 (0.830-2.325) | 0.211 |  |  |
| Age | 0.992 (0.997-1.008) | 0.318 | 0.995 (0.978-1.012) | 0.543 |
| Ganciclovir treated | 1.212 (0.752-1.955) | 0.430 | 1.533 (0.896-2.624) | 0.119 |
| Pneumonia | 1.959 (0.713-5.385) | 0.192 |  |  |
| ICU | 0.842 (0.503-1.409) | 0.513 | 0.513 (0.262-1.004) | 0.051 |
| Mechanical ventilation | 1.270 (0.705-2.287) | 0.427 |  |  |
| Quick SOFA | 1.277 (0.900-1.813) | 0.171 | 1.595 (1.049-2.426) | 0.029 |
| CWI | 0.850 (0.662-1.091) | 0.203 | 0.740 (0.423-1.295) | 0.292 |
| Hospital days>30 | 0.923 (0.574-1.486) | 0.742 |  |  |
| CMV PCR titer>50,000 | 0.932 (0.560-1.549) | 0.785 | 0.740 (0.423-1.295) | 0.292 |
| Progress to CMV disease | 0.261 (0.064-1.068) | 0.062 |  |  |
| Cardiovascular event | 1.451 (0.455-4.620) | 0.529 |  |  |

Abbreviations : ICU, intesive care unit; SOFA, sequential organ failure assessment ; CWI, Charlson’s weighted index of comorbidity; CMV, Cytomegalovirus ; PCR, polymerase chain reaction

**Table S2. Association between baseline characteristics of patients and 90-days survival**

|  | Univariate |  | Multivariate |  |
| --- | --- | --- | --- | --- |
|  | HR (95% CI) | P value | HR (95% CI) | P value |
| Sex | 1.537 (0.642-3.682) | 0.334 |  |  |
| Age | 1.024 (0.993-1.057) | 0.125 | 1.030 (0.994-1.067) | 0.108 |
| Ganciclovir treated | 2.076 (0.917-4.700) | 0.080 | 2.006 (0.654-6.158) | 0.224 |
| Pneumonia | 2.258 (0.305-16.691) | 0.425 |  |  |
| ICU | 2.659 (1.206-5.861) | 0.015 | 2.051 (0.760-5.533) | 0.156 |
| Mechanical ventilation | 1.695 (0.708-4.060) | 0.237 |  |  |
| Quick SOFA | 1.832 (1.044-3.214) | 0.035 | 1.318 (0.665-2.613) | 0.429 |
| CWI | 1.182 (0.798-1.72) | 0.405 | 1.007 (0.650-1.561) | 0.975 |
| Hospital days>30 | 1.031 (0.468-2.271) | 0.940 |  |  |
| CMV PCR titer>50,000 | 2.064 (0.942-4.525) | 0.070 | 2.291 (0.975-5.383) | 0.057 |
| Progress to  CMV disease | 1.864 (0.558-6.229) | 0.312 |  |  |
| Cardiovascular event | 0.854 (0.115-6.310) | 0.877 |  |  |

Abbreviations : ICU, intesive care unit; SOFA, sequential organ failure assessment ; CWI, Charlson’s weighted index of comorbidity; CMV, Cytomegalovirus ; PCR, polymerase chain reaction
